# Supplementary material for: Qigong Mind-Body Exercise as a Biopsychosocial Therapy for Persistent Post-Surgical Pain in Breast Cancer: A Pilot Study
Source: PubMed Central journal article supplement — Integr Cancer Ther. 2020 Feb 1;19:1534735419893766. doi: 10.1177/1534735419893766 (PMC7050958; doi:10.1177/1534735419893766), 2020-02-01
Supplement: QMBE_SUPPLEMENT_1_Qigong_protocol.pdf [file QMBE_SUPPLEMENT_1_Qigong_protocol.pdf]

**Qigong Mind-Body Exercise as a Biopsychosocial Therapy for Persistent Post-Surgical Pain in Breast Cancer: A Pilot Study**

**Supplement 1. Summary of Qigong Mind-Body Exercise intervention protocol**

| <u>Week</u> | <u>Activities</u>                                    | <u>Approximate Duration (in minutes)</u> |
|-------------|------------------------------------------------------|------------------------------------------|
| 1-2         | Check-in                                             | 2                                        |
|             | Qigong warm-up exercises                             |                                          |
|             | Qigong swinging and drumming the body                |                                          |
|             | Swinging up and down                                 |                                          |
|             | Spiraling the waist                                  |                                          |
|             | Mindful stretching                                   | 20                                       |
|             | Lower extremities (feet, ankles, knees)              |                                          |
|             | Upper extremities (hands, arms, shoulder)            |                                          |
|             | Spinal cord breathing                                |                                          |
|             | Washing with Qi from the heavens                     |                                          |
|             | Tan Tien breathing                                   |                                          |
|             | Introduction to Eight Brocades movements #1-4        | 45                                       |
|             | #1 Holding up the sky with both hands                |                                          |
|             | #2 Turning to gaze at the moon over the shoulder     |                                          |
|             | #3 Drawing the bow and arrow                         |                                          |
|             | #4 Separating heaven and earth                       |                                          |
|             | Cool-down exercises                                  | 8                                        |
|             | Self-massage and meridian tapping                    |                                          |
| 3-8         | Check-in                                             | 2                                        |
|             | Qigong warm-up exercises                             | 10                                       |
|             | Review/practice Eight Brocades movements #1-4        | 15                                       |
|             | Learn and practice Eight Brocades movements #5-8     | 40                                       |
|             | #5 Hanging the arm and head and opening the flank    |                                          |
|             | #6 Squatting to reinforce the kidneys                |                                          |
|             | #7 Punching with connection and intention            |                                          |
|             | #8 Shaking to ward off illness                       |                                          |
|             | Cool-down exercises                                  | 8                                        |
| 9-12        | Check-in                                             | 2                                        |
|             | Qigong warm-up exercises                             | 20                                       |
|             | Review/practice/refine Eight Brocades movements #1-8 | 45                                       |
|             | Cool-down exercises                                  | 8                                        |
